# Supplementary material for: The Influence of Interannual Climate Variability on Regional Violent Crime Rates in the United States
Source: PubMed Central journal article supplement — Geohealth. 2018 Nov 21;2(11):356–69. doi: 10.1029/2018GH000152 (PMC7007136; doi:10.1029/2018gh000152), 2018-11-21
Supplement: GH2-2-356-s001.pdf [file GH2-2-356-s001.pdf]

1 **Supplementary Materials**

| 2  | <b>Crime Type</b>   | <b>Percent of Initial Dataset</b> | <b>Percent of FBI 1981-2014 estimate</b> |
|----|---------------------|-----------------------------------|------------------------------------------|
| 3  | Violent Crime       | 90.4                              | 85.9                                     |
| 4  | Homicide            | 89.4                              | 85.2                                     |
| 5  | Forcible Rape       | 88.4                              | 82.0                                     |
| 6  | Robbery             | 92.2                              | 89.0                                     |
| 7  | Aggravated Assault  | 89.5                              | 84.6                                     |
| 8  | Simple Assault      | 89.9                              | N/A                                      |
| 9  | Property Crime      | 90.7                              | 85.4                                     |
| 10 | Larceny             | 91.5                              | 84.7                                     |
| 11 | Burglary            | 90.2                              | 86.2                                     |
| 12 | Motor Vehicle Theft | 91.6                              | 87.8                                     |

13  
14 **Supplementary Table 1.** Percentage of initial UCR dataset which passed through quality control  
15 processes and percentage of FBI 1981-2014 annually estimated totals which were used in  
16 calculations of regional correlation coefficients, per crime type.  
17

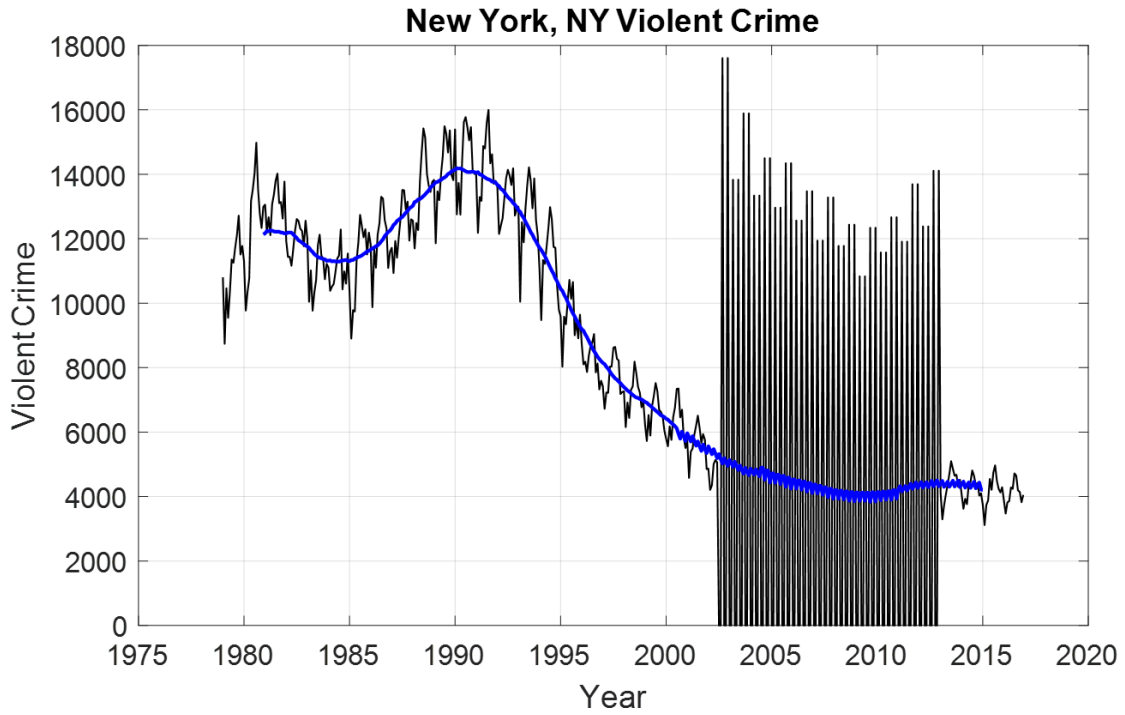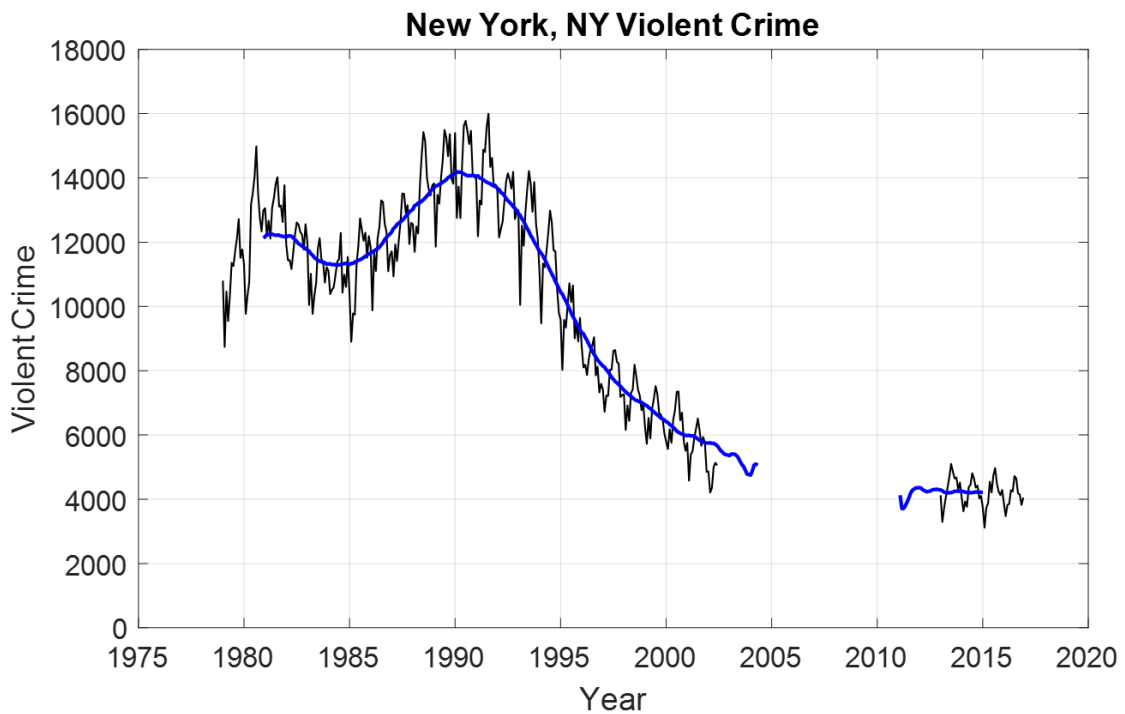

18

19 **Supplementary Figure 1.** Top: New York, NY violent crime (black) overlaid with a four-year  
 20 running mean (blue). Bottom: Same as top but after quality control.

21

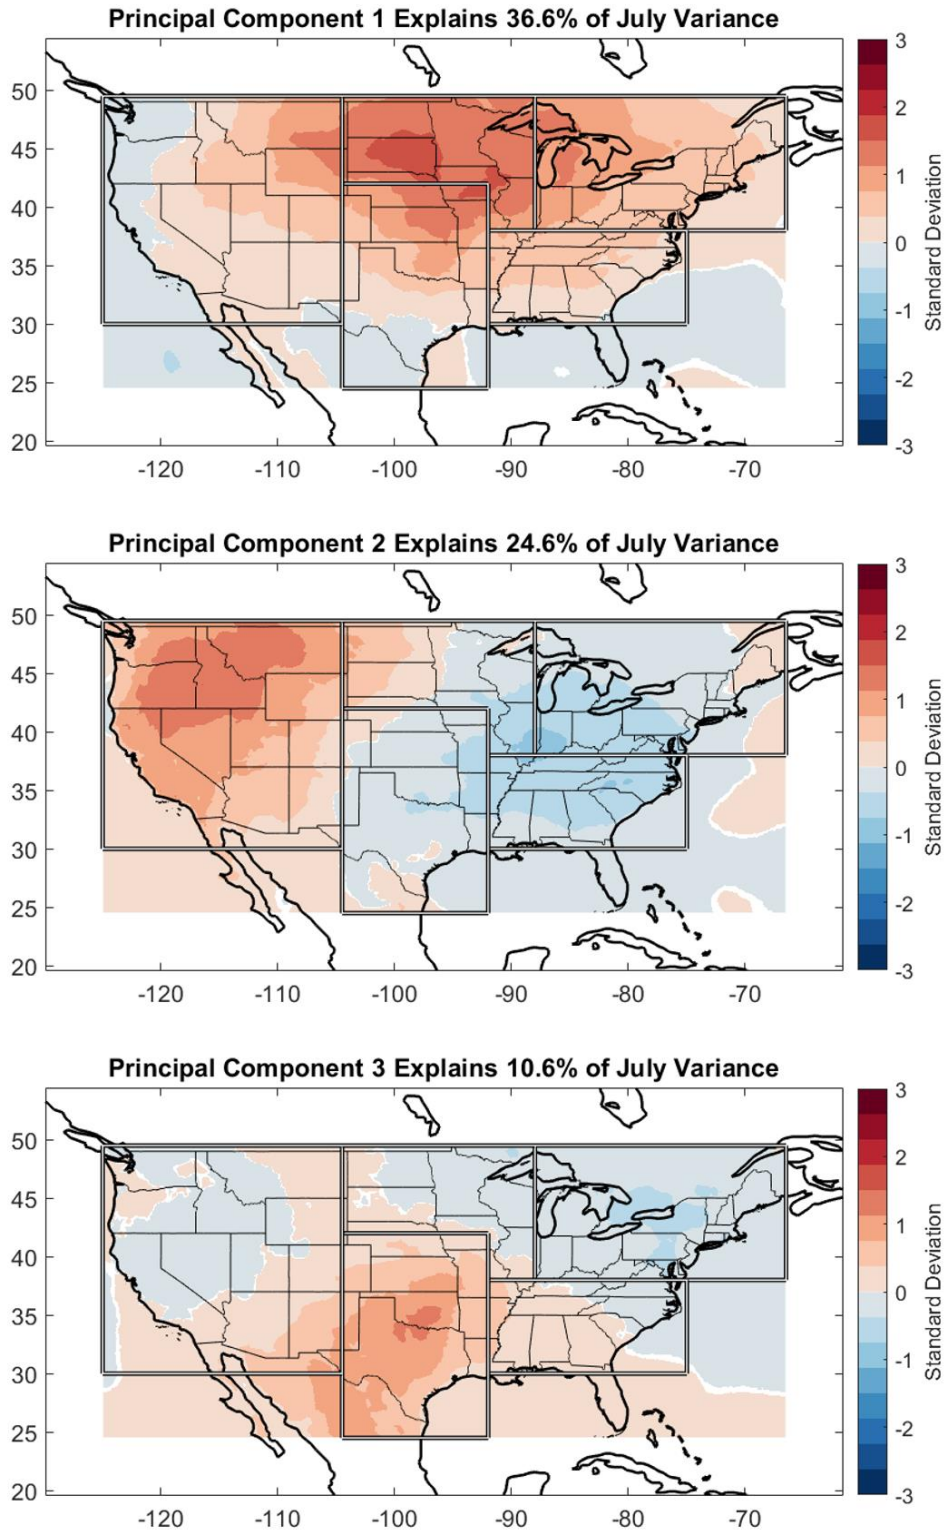

22

23 **Supplementary Figure 2.** First three principal components of an EOF analysis of July  
 24 temperature. The variance explained by each principal component in descending order is 36.6%,  
 25 24.6%, and 10.6% and the total variance explained by these three patterns combined is 71.6%.

26

|    | Jan    | Feb    | Mar    | Apr    | May    | Jun   | Jul    | Aug   | Sep    | Oct  | Nov    | Dec    |
|----|--------|--------|--------|--------|--------|-------|--------|-------|--------|------|--------|--------|
| NE | 0.61** | 0.53** | 0.44*  | 0.51** | 0.15   | 0.15  | 0.20   | 0.29  | 0.52** | 0.14 | 0.47** | 0.41*  |
| SE | 0.55** | 0.44*  | 0.71** | 0.33   | 0.26   | 0.29  | 0.47** | 0.09  | 0.52** | 0.15 | 0.02   | 0.63** |
| SC | 0.59** | 0.40*  | 0.49** | 0.38*  | 0.16   | 0.25  | -0.01  | -0.12 | 0.33   | 0.06 | 0.12   | 0.79** |
| WE | 0.34   | 0.65** | 0.56** | 0.49** | 0.48** | 0.40* | 0.12   | 0.22  | 0.30   | 0.33 | 0.69** | 0.55** |
| MW | 0.61** | 0.55** | 0.59** | 0.35*  | 0.24   | -0.02 | 0.24   | 0.03  | 0.46** | 0.21 | 0.06   | 0.49** |

\* -  $p < 0.05$       \*\* -  $p < 0.01$

**Supplementary Table 2.** Monthly correlations between violent crime and monthly temperature anomalies of all cities within each region. This information is identical to that shared in Figure 6 (left). All significance tests are two-tailed Student's t-tests.

|    | Jan    | Feb    | Mar    | Apr    | May   | Jun   | Jul   | Aug   | Sep  | Oct   | Nov    | Dec    |
|----|--------|--------|--------|--------|-------|-------|-------|-------|------|-------|--------|--------|
| NE | 0.83** | 0.61** | 0.45** | 0.46** | 0.18  | 0.14  | 0.10  | 0.31  | 0.17 | 0.21  | 0.60** | 0.72** |
| SE | 0.36*  | 0.37*  | 0.29   | 0.28   | 0.24  | 0.34  | 0.01  | -0.11 | 0.14 | 0.02  | 0.12   | 0.52** |
| SC | 0.53** | 0.27   | 0.14   | 0.11   | 0.22  | -0.09 | -0.17 | -0.02 | 0.13 | -0.34 | 0.13   | 0.68** |
| WE | 0.06   | 0.59** | 0.14   | 0.14   | -0.05 | -0.16 | -0.09 | -0.08 | 0.12 | -0.03 | 0.18   | 0.26   |
| MW | 0.85** | 0.57** | 0.54** | 0.54** | 0.18  | -0.10 | 0.23  | 0.39* | 0.21 | 0.28  | 0.70** | 0.87** |

\* -  $p < 0.05$       \*\* -  $p < 0.01$

**Supplementary Table 3.** Monthly correlations between property crime and average temperature anomalies of all cities within each region. This information is identical to that shared in Figure 7 (left). All significance tests are two-tailed Student's t-tests.

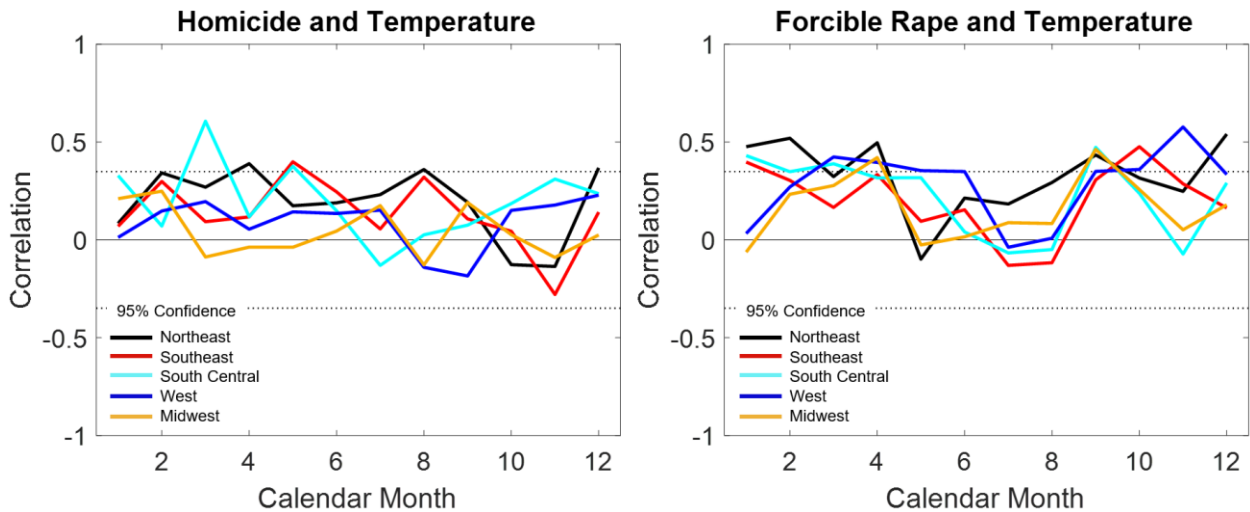

**Supplementary Figure 3.** Left: monthly correlations between homicide and monthly temperature anomalies of all cities within each region. Right: same as left but for forcible rape.

|    | Jan  | Feb  | Mar    | Apr   | May   | Jun  | Jul   | Aug   | Sep   | Oct   | Nov   | Dec   |
|----|------|------|--------|-------|-------|------|-------|-------|-------|-------|-------|-------|
| NE | 0.08 | 0.34 | 0.27   | 0.39* | 0.17  | 0.19 | 0.23  | 0.36* | 0.19  | -0.13 | -0.14 | 0.37* |
| SE | 0.07 | 0.30 | 0.09   | 0.12  | 0.40* | 0.25 | 0.06  | 0.32  | 0.11  | 0.04  | -0.28 | 0.14  |
| SC | 0.33 | 0.07 | 0.61** | 0.12  | 0.38* | 0.15 | -0.13 | 0.03  | 0.08  | 0.19  | 0.31  | 0.24  |
| WE | 0.01 | 0.15 | 0.20   | 0.05  | 0.14  | 0.13 | 0.15  | -0.14 | -0.18 | 0.15  | 0.18  | 0.23  |
| MW | 0.21 | 0.25 | -0.09  | -0.04 | -0.04 | 0.04 | 0.18  | -0.13 | 0.19  | 0.03  | -0.09 | 0.03  |

\* -  $p < 0.05$       \*\* -  $p < 0.01$

**Supplementary Table 4.** Monthly correlations between homicide and monthly temperature anomalies of all cities within each region. This information is identical to that shared in Supplementary Figure 2 (left). All significance tests are two-tailed Student's t-tests.

|    | Jan    | Feb    | Mar    | Apr    | May   | Jun   | Jul   | Aug   | Sep    | Oct    | Nov    | Dec    |
|----|--------|--------|--------|--------|-------|-------|-------|-------|--------|--------|--------|--------|
| NE | 0.48** | 0.52** | 0.32   | 0.50** | -0.10 | 0.21  | 0.18  | 0.29  | 0.43*  | 0.32   | 0.25   | 0.54** |
| SE | 0.40*  | 0.30   | 0.17   | 0.33   | 0.09  | 0.15  | -0.13 | -0.12 | 0.31   | 0.48** | 0.29   | 0.16   |
| SC | 0.43*  | 0.35*  | 0.39*  | 0.32   | 0.32  | 0.04  | -0.07 | -0.05 | 0.47** | 0.24   | -0.07  | 0.29   |
| WE | 0.03   | 0.27   | 0.42** | 0.40*  | 0.35* | 0.35* | -0.04 | 0.01  | 0.35*  | 0.36*  | 0.58** | 0.33   |
| MW | -0.06  | 0.23   | 0.28   | 0.42*  | -0.03 | 0.02  | 0.09  | 0.08  | 0.46** | 0.26   | 0.05   | 0.18   |

\* -  $p < 0.05$       \*\* -  $p < 0.01$

**Supplementary Table 5.** Monthly correlations between forcible rape and monthly temperature anomalies of all cities within each region. This information is identical to that shared in Supplementary Figure 2 (right). All significance tests are two-tailed Student's t-tests.

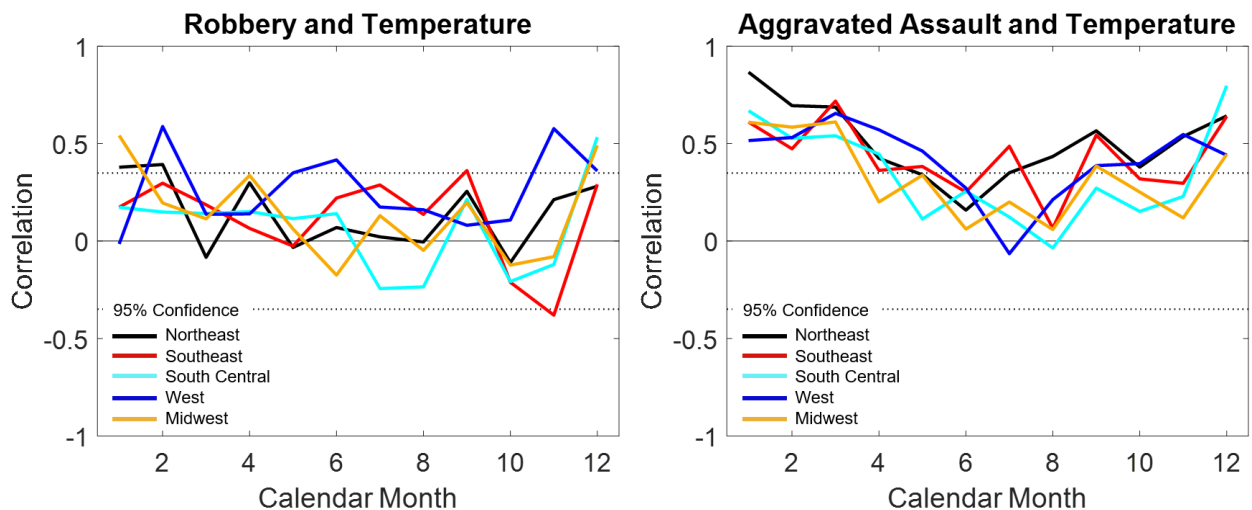

**Supplementary Figure 4.** Left: monthly correlations between robbery and monthly temperature anomalies of all cities within each region. Right: same as left but for aggravated assault.

|    | Jan    | Feb    | Mar   | Apr  | May   | Jun   | Jul   | Aug   | Sep   | Oct   | Nov    | Dec    |
|----|--------|--------|-------|------|-------|-------|-------|-------|-------|-------|--------|--------|
| NE | 0.38*  | 0.39*  | -0.08 | 0.30 | -0.03 | 0.07  | 0.02  | 0.00  | 0.26  | -0.11 | 0.21   | 0.28   |
| SE | 0.17   | 0.30   | 0.19  | 0.07 | -0.03 | 0.22  | 0.29  | 0.14  | 0.36* | -0.21 | -0.38* | 0.29   |
| SC | 0.17   | 0.15   | 0.14  | 0.15 | 0.12  | 0.14  | -0.24 | -0.23 | 0.21  | -0.21 | -0.12  | 0.53** |
| WE | -0.01  | 0.59** | 0.14  | 0.14 | 0.35* | 0.42* | 0.17  | 0.16  | 0.08  | 0.11  | 0.58** | 0.36*  |
| MW | 0.54** | 0.20   | 0.11  | 0.34 | 0.06  | -0.17 | 0.13  | -0.05 | 0.20  | -0.12 | -0.08  | 0.49** |

\* -  $p < 0.05$       \*\* -  $p < 0.01$

**Supplementary Table 6.** Monthly correlations between robbery and monthly temperature anomalies of all cities within each region. This information is identical to that shared in Supplementary Figure 3 (left). All significance tests are two-tailed Student's t-tests.

|    | Jan    | Feb    | Mar    | Apr    | May    | Jun  | Jul    | Aug   | Sep    | Oct   | Nov    | Dec    |
|----|--------|--------|--------|--------|--------|------|--------|-------|--------|-------|--------|--------|
| NE | 0.87** | 0.69** | 0.69** | 0.42*  | 0.34   | 0.16 | 0.35*  | 0.43* | 0.57** | 0.38* | 0.54** | 0.64** |
| SE | 0.61** | 0.47** | 0.72** | 0.36*  | 0.38*  | 0.25 | 0.49** | 0.07  | 0.54** | 0.32  | 0.30   | 0.64** |
| SC | 0.67** | 0.53** | 0.54** | 0.45** | 0.11   | 0.26 | 0.12   | -0.04 | 0.27   | 0.15  | 0.23   | 0.80** |
| WE | 0.52** | 0.53** | 0.66** | 0.57** | 0.46** | 0.27 | -0.06  | 0.21  | 0.39*  | 0.40* | 0.55** | 0.44*  |
| MW | 0.61** | 0.58** | 0.61** | 0.20   | 0.34   | 0.06 | 0.20   | 0.06  | 0.39*  | 0.25  | 0.12   | 0.44*  |

\* -  $p < 0.05$       \*\* -  $p < 0.01$

**Supplementary Table 7.** Monthly correlations between aggravated assault and monthly temperature anomalies of all cities within each region. This information is identical to that shared in Supplementary Figure 3 (right). All significance tests are two-tailed Student's t-tests.

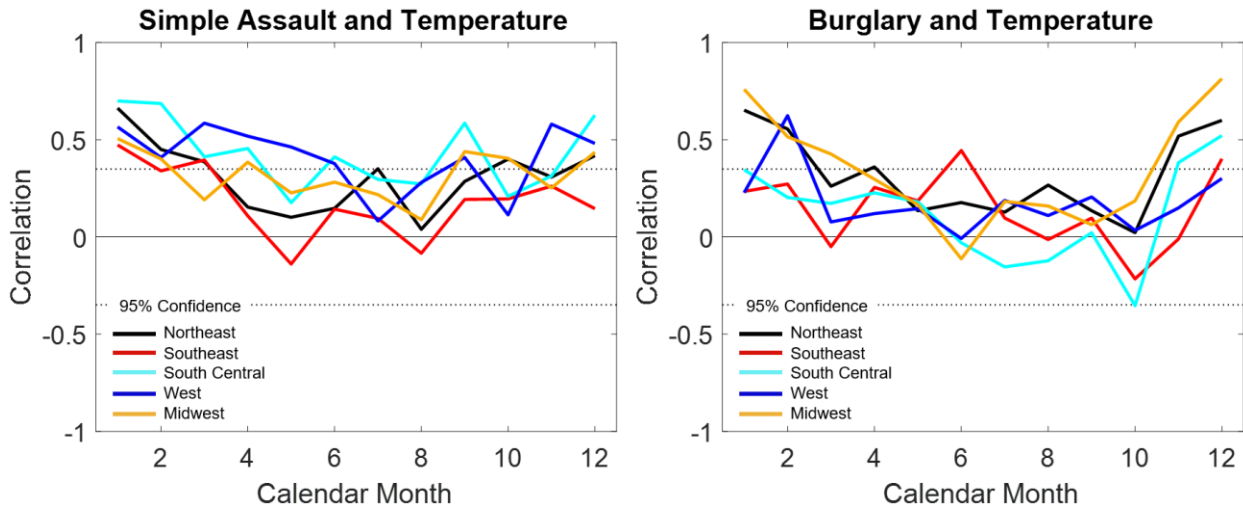

**Supplementary Figure 5.** Left: monthly correlations between simple assault and monthly temperature anomalies of all cities within each region. Right: same as left but for burglary.

|    | Jan    | Feb    | Mar    | Apr    | May    | Jun   | Jul   | Aug   | Sep    | Oct   | Nov    | Dec    |
|----|--------|--------|--------|--------|--------|-------|-------|-------|--------|-------|--------|--------|
| NE | 0.66** | 0.45** | 0.39*  | 0.15   | 0.10   | 0.15  | 0.35* | 0.04  | 0.29   | 0.40* | 0.31   | 0.42** |
| SE | 0.47** | 0.34   | 0.40*  | 0.11   | -0.14  | 0.14  | 0.10  | -0.08 | 0.19   | 0.20  | 0.26   | 0.15   |
| SC | 0.70** | 0.69** | 0.41*  | 0.45** | 0.18   | 0.41* | 0.30  | 0.27  | 0.59** | 0.21  | 0.31   | 0.63** |
| WE | 0.57** | 0.41*  | 0.58** | 0.52** | 0.46** | 0.38* | 0.08  | 0.28  | 0.41*  | 0.11  | 0.58** | 0.48** |
| MW | 0.51** | 0.40*  | 0.19   | 0.38*  | 0.23   | 0.28  | 0.22  | 0.09  | 0.44*  | 0.40* | 0.25   | 0.44*  |

\* -  $p < 0.05$       \*\* -  $p < 0.01$

**Supplementary Table 8.** Monthly correlations between simple assault and monthly temperature anomalies of all cities within each region. This information is identical to that shared in Supplementary Figure 4 (left). All significance tests are two-tailed Student's t-tests.

|    | Jan    | Feb    | Mar   | Apr   | May  | Jun   | Jul   | Aug   | Sep  | Oct   | Nov    | Dec    |
|----|--------|--------|-------|-------|------|-------|-------|-------|------|-------|--------|--------|
| NE | 0.65** | 0.56** | 0.26  | 0.36* | 0.13 | 0.18  | 0.13  | 0.27  | 0.13 | 0.02  | 0.52** | 0.60** |
| SE | 0.23   | 0.27   | -0.05 | 0.25  | 0.19 | 0.44* | 0.10  | -0.01 | 0.10 | -0.22 | -0.01  | 0.40*  |
| SC | 0.35*  | 0.20   | 0.17  | 0.23  | 0.18 | -0.03 | -0.15 | -0.12 | 0.02 | -0.35 | 0.38*  | 0.52** |
| WE | 0.23   | 0.62** | 0.08  | 0.12  | 0.15 | -0.01 | 0.19  | 0.11  | 0.21 | 0.03  | 0.15   | 0.30   |
| MW | 0.76** | 0.52** | 0.43* | 0.30  | 0.17 | -0.11 | 0.18  | 0.16  | 0.06 | 0.19  | 0.59** | 0.81** |

\* -  $p < 0.05$       \*\* -  $p < 0.01$

**Supplementary Table 9.** Monthly correlations between burglary and monthly temperature anomalies of all cities within each region. This information is identical to that shared in Supplementary Figure 4 (right). All significance tests are two-tailed Student's t-tests.

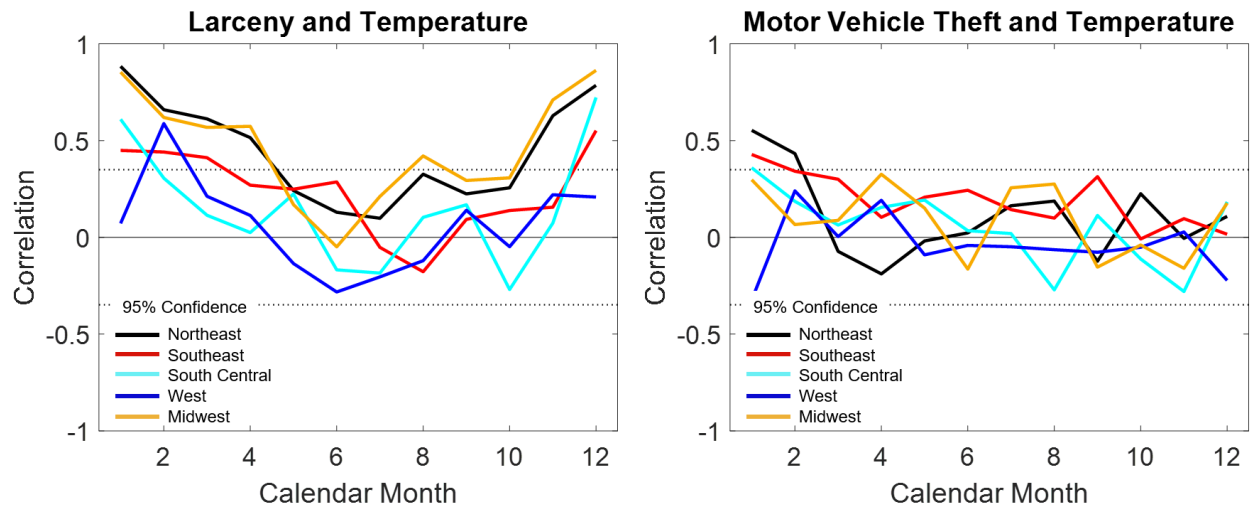

**Supplementary Figure 6.** Left: monthly correlations between larceny and monthly temperature anomalies of all cities within each region. Right: same as left but for motor vehicle theft.

|        | Jan    | Feb    | Mar    | Apr    | May   | Jun   | Jul   | Aug   | Sep  | Oct   | Nov    | Dec    |
|--------|--------|--------|--------|--------|-------|-------|-------|-------|------|-------|--------|--------|
| 157 NE | 0.88** | 0.66** | 0.61** | 0.52** | 0.24  | 0.13  | 0.10  | 0.33  | 0.22 | 0.26  | 0.63** | 0.79** |
| 158 SE | 0.45** | 0.44*  | 0.41*  | 0.27   | 0.25  | 0.29  | -0.05 | -0.18 | 0.09 | 0.14  | 0.16   | 0.55** |
| 159 SC | 0.61** | 0.31   | 0.11   | 0.02   | 0.22  | -0.17 | -0.18 | 0.10  | 0.17 | -0.27 | 0.07   | 0.72** |
| 160 WE | 0.07   | 0.59** | 0.21   | 0.11   | -0.14 | -0.28 | -0.20 | -0.12 | 0.14 | -0.05 | 0.22   | 0.21   |
| 161 MW | 0.85** | 0.62** | 0.57** | 0.57** | 0.17  | -0.05 | 0.21  | 0.42* | 0.29 | 0.31  | 0.71** | 0.86** |

\* -  $p < 0.05$       \*\* -  $p < 0.01$

165 **Supplementary Table 10.** Monthly correlations between larceny and monthly temperature  
166 anomalies of all cities within each region. This information is identical to that shared in  
167 Supplementary Figure 5 (right). All significance tests are two-tailed Student's t-tests.

|        | Jan    | Feb   | Mar   | Apr   | May   | Jun   | Jul   | Aug   | Sep   | Oct   | Nov   | Dec   |
|--------|--------|-------|-------|-------|-------|-------|-------|-------|-------|-------|-------|-------|
| 171 NE | 0.55** | 0.43* | -0.07 | -0.19 | -0.02 | 0.02  | 0.16  | 0.19  | -0.12 | 0.23  | -0.01 | 0.11  |
| 172 SE | 0.43*  | 0.34  | 0.30  | 0.10  | 0.21  | 0.24  | 0.14  | 0.10  | 0.31  | -0.01 | 0.10  | 0.02  |
| 173 SC | 0.36*  | 0.19  | 0.06  | 0.15  | 0.19  | 0.03  | 0.02  | -0.27 | 0.11  | -0.11 | -0.28 | 0.18  |
| 174 WE | -0.32  | 0.24  | 0.00  | 0.19  | -0.09 | -0.04 | -0.05 | -0.06 | -0.08 | -0.05 | 0.03  | -0.22 |
| 175 MW | 0.30   | 0.07  | 0.09  | 0.33  | 0.15  | -0.16 | 0.26  | 0.28  | -0.15 | -0.04 | -0.16 | 0.18  |

\* -  $p < 0.05$       \*\* -  $p < 0.01$

179 **Supplementary Table 11.** Monthly correlations between motor vehicle theft and monthly  
180 temperature anomalies of all cities within each region. This information is identical to that shared  
181 in Supplementary Figure 4 (right). All significance tests are two-tailed Student's t-tests.
